# Supplementary material
Source: PubMed Central journal article supplement (PMC2890817)
Supplement: 0913534107_Appendix.pdf [file 0913534107_Appendix.pdf]

## SUPPORTING INFORMATION

### A Stabilizing Capping Motif for $\beta$ Hairpins and Sheets

Brandon L Kier, Irene Shu, Lisa A. Eidenschink & Niels H Andersen

#### Table of Contents

- Item 1**      **EtF W/W Pairs Flip to FtE**  
Includes figures S1A and S1B
- Item 2**      **Amide Exchange Data**  
Includes figures S2A and S2B and tables S2A and S2B
- Item 3**      **Mutants of Ac-WITVTIHGKKIRVWTG-NH<sub>2</sub>**  
Includes figure S3 and table S3
- Item 4**      **Chemical Shift data for –RWQYVZGKFTXQ- Species**  
Includes figure S4 and table S4
- Item 5**      **Mutations of the Key W/W Pair**  
Includes tables S5A and S5B
- Item 6**      **Structural Data**  
Includes figures S6A-C and table S6
- Item 7**      **Raw Chemical Shift Data**  
Includes tables S7A-P

#### References

1. Bai, Y., Milne, J.S., Mayne, L. and Englander, S.W. Primary structure effects on peptide group hydrogen exchange. *Proteins* **17**, 75-86 (1993).
2. Kier, B.L. & Andersen, N.H. Probing the lower size limit for fold protein-like fold stability: ten-residue microproteins with specific, rigid structures in water. *J. Am. Chem. Soc.* **130** 14675-14683 (2008).
3. Espinosa, J.F., Syud, F.A. & Gellman, S.H. Analysis of the factors that stabilize a designed two-stranded antiparallel  $\beta$ -sheet. *Prot. Sci.* **11**, 1492-1505 (2002).

## Supporting Information Item 1: EtF W/W pairs flip to FtE

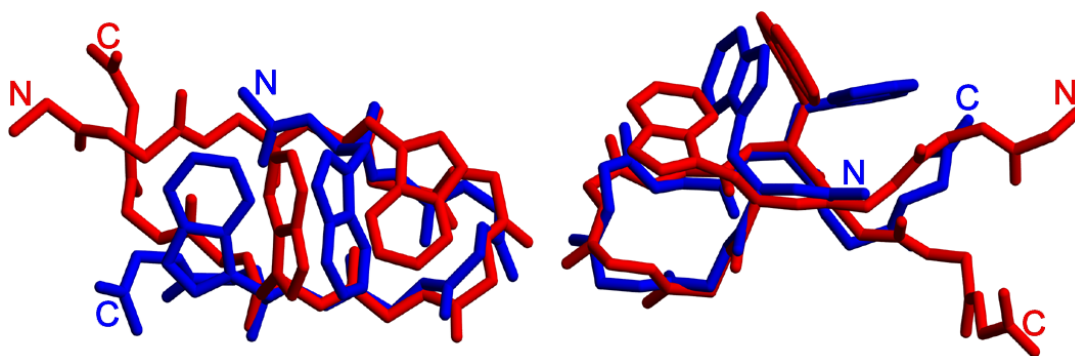

**Figure S1A:** EtF (Edge-to-Face) vs FtE (Face-to-Edge) Trp/Trp pairs. Two views of the overlays of lowest-energy structures for peptides WP (blue, Ac-WINGKWTG-NH<sub>2</sub>) and HP6Va (KYVWINGKWTVE) are shown, with the N and C termini labeled. The Trp/Trp pair of peptide HP6Va (red) adopts an EtF interaction: the N-terminal Trp is “edge” (its sidechain displays significant ring current shifts) and it interacts with the amide units of the turn. The Trp/Trp pair of the WP peptide (blue) adopts a FtE interaction: the C-terminal Trp is “edge” (its sidechain displays significant ring current shifts) and it interacts with the amide unit of the C-terminal i+2 glycine.

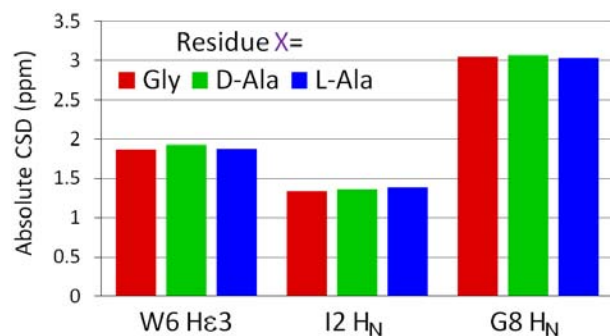

**Figure S1B:** Ac-WIpXKWTG-NH<sub>2</sub> Comparisons (p = D-Pro). NMR CSD (Chemical Shift Deviation, from expected random coil values) data at 280K.

This illustrates the lack of interplay between turn type and W/W orientation even in turn-flanking FtE interactions.

**Supporting Information Item 2: Amide Exchange Data for Peptides Ac-WITVTIHGKKIRVWTG-NH<sub>2</sub> and Ac-WVTIpGKKIWTG-NH<sub>2</sub>.**

| Table S2A: Ac-WITVTIHGKKIRVWTG-NH <sub>2</sub> Amide Exchange Data |                  |                   |                                                  |        |                           |          |
|--------------------------------------------------------------------|------------------|-------------------|--------------------------------------------------|--------|---------------------------|----------|
| Residue                                                            | Rates            |                   | ProtFact<br>(k <sub>RC</sub> /k <sub>exp</sub> ) | %fold  | ΔG <sub>u</sub><br>kJ/mol |          |
|                                                                    | k <sub>exp</sub> | k <sub>RC</sub> * |                                                  |        |                           |          |
| Trp1                                                               | 0.00685          | 0.7041            | 103                                              | 99.04% | 10.79                     | best     |
| Ile2                                                               | 0.00314          | 0.2616            | 83                                               | 98.81% | 10.30                     | best     |
| Val4                                                               | 0.0057           | 0.5723            | 100                                              | 99.01% | 10.73                     | best     |
| Ile6                                                               | 0.02418          | 0.5341            | 22                                               | 95.67% | 7.21                      | less     |
| Lys9                                                               | 0.0496           | 2.441             | 49                                               | 98.01% | 9.07                      | moderate |
| Ile11                                                              | 0.00451          | 0.4442            | 99                                               | 98.99% | 10.69                     | best     |
| Arg12                                                              | 0.02128          | 1.281             | 60                                               | 98.37% | 9.54                      | moderate |
| Val13                                                              | 0.00653          | 0.5993            | 92                                               | 98.92% | 10.52                     | best     |
| Trp14                                                              | 0.02459          | 0.5101            | 21                                               | 95.40% | 7.06                      | less     |

\*Random Coil Value determined using Molday Factors<sup>1</sup> (pD=5.89)

The kinetic plots, ln(peak integral) vs time, appear in Figure S2A (next page).

The protection factors are plotted on to a depiction of the hairpin geometry below:

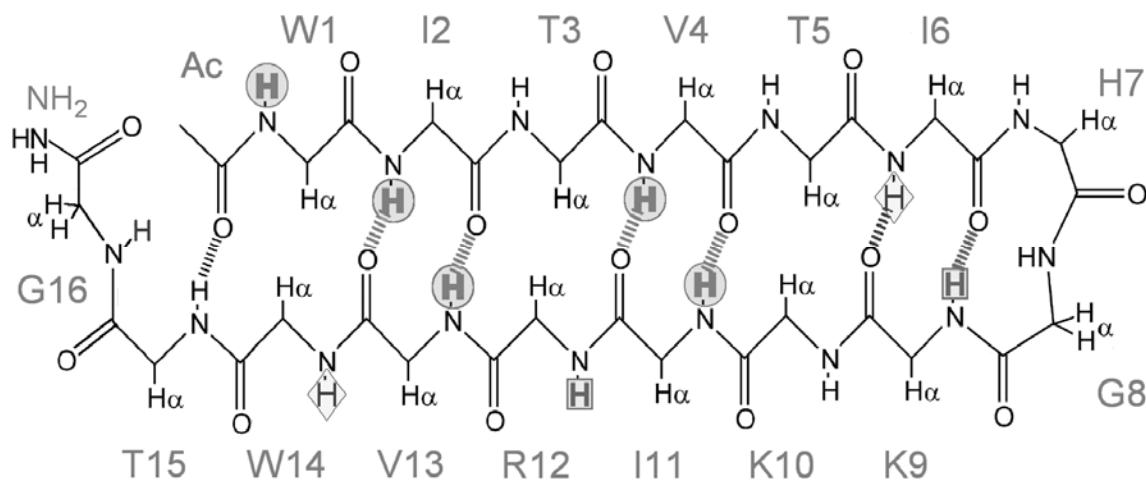

Protection factors for amide hydrogens in Ac-WITVTIHGKKIRVWTG-NH<sub>2</sub> at 280K, pD 5.89. Circled: highly protected (Protection factors of 83x-103x) Boxed: well protected (49x-60x) Diamonds: some protection (21x-22x) Plain: no evidence for protection. In the case of highly shifted G16H<sub>N</sub>, measuring the exchange rate was complicated by overlap with H<sub>α</sub> protons.

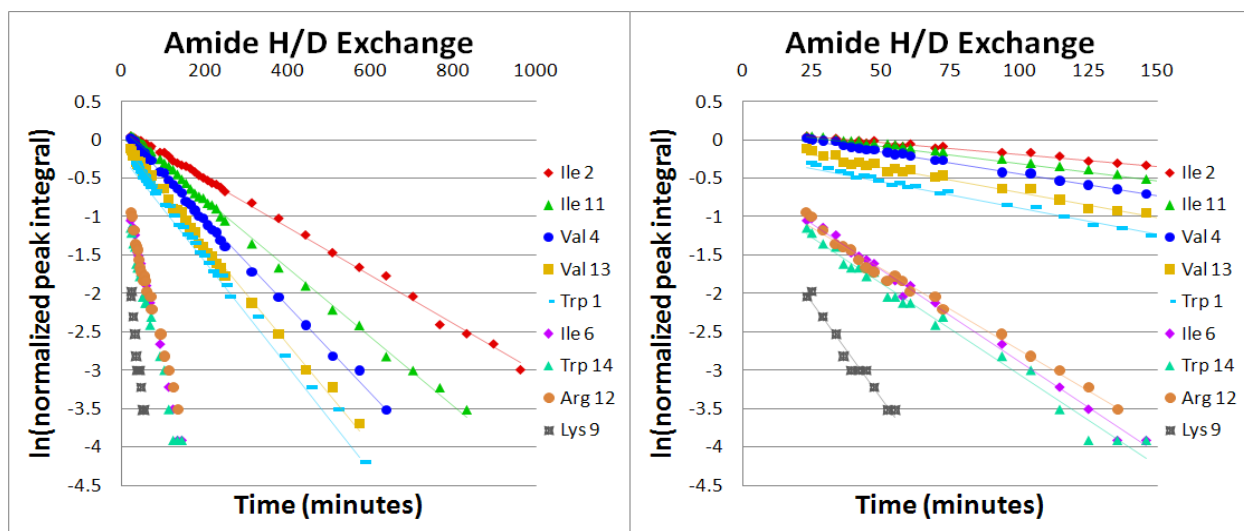

**Figure S2A:** Raw exchange data plotted for peptide Ac-WITVTIHGKKIRVWTG-NH<sub>2</sub> (blow-up of fast exchange domain on right.)

**Table S2B: Ac-WVTIpGKKIWTG-NH<sub>2</sub> amide exchange data**

| Residue | Rates     |            | ProtFact | %fold  | $\Delta G_u$ |      |
|---------|-----------|------------|----------|--------|--------------|------|
|         | $k_{exp}$ | $k_{RC}^*$ |          |        |              |      |
| Trp1    | 0.007987  | 0.8457     | 106      | 99.06% | 10.85        | best |
| Val2    | 0.007239  | 0.3367     | 47       | 97.90% | 8.94         |      |
| Ile4    | 0.00554   | 0.6415     | 116      | 99.14% | 11.06        | best |
| Lys7    | 0.0197    | 2.932      | 149      | 99.33% | 11.65        | best |
| Lys8    | 0.0437    | 2.613      | 60       | 98.36% | 9.52         |      |
| Ile9    | 0.006336  | 0.5336     | 84       | 98.83% | 10.32        | best |

\*Random Coil Value determined using Molday Factors (pD=5.97)

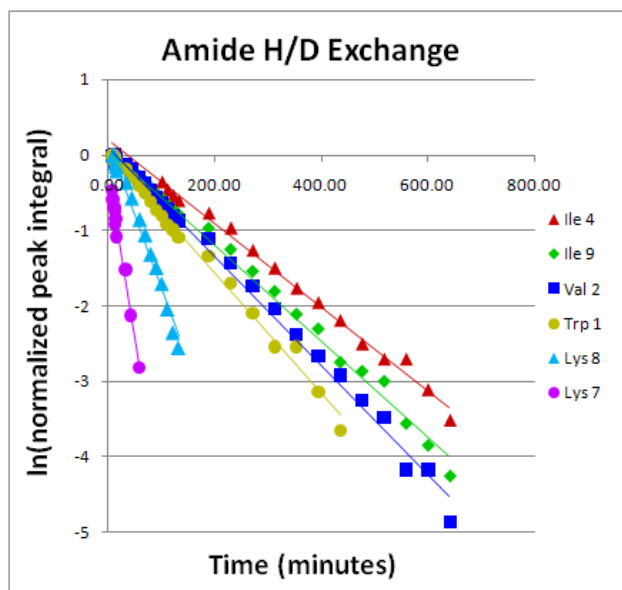

**Figure S2B:** Raw exchange data plotted for peptide Ac-WVTIpGKKIWTG-NH<sub>2</sub>

### Supporting Information Item 3: Mutants of Ac-WITVTIHGKKIRVWTG-NH<sub>2</sub> Illustrating the Cap's Specificity, Anti-Fraying Characteristics, and Significant Contribution to Fold Stability

Note the significant fraying not only for +WITVTIHGKKIRVWTG-NH<sub>2</sub> (highlighted in the main text; see Fig. 4) but also Ac-TIWVTIHGKKIWRVTG-NH<sub>2</sub>; a peptide isomeric with Ac-WITVTIHGKKIRVWTG-NH<sub>2</sub> but with the Trp pair “swapped in” to a non-H-bonded position nearer to the turn. It is not just frayed, but displays lower core fold population (79%) and lacks a specific W/W conformation (no EtF or FtE) suggesting that the W/W interaction alone is not responsible for the cap. Also note that the Ac- extension is preferred over peptidic extensions (eg. mutating AT to Ac- is worth roughly 5.2 kJ/mol; Ac-GG to Ac- is worth 4.3.)

| Table S3 <sup>a</sup>               | $\chi_F$ turn <sup>b</sup> | $\chi_F$ mid <sup>c</sup> | $\chi_F$ ends <sup>d</sup> | $\chi_F$ W <sub>Cterm</sub> <sup>e</sup> | $\Delta\Delta G$ <sup>f</sup> |
|-------------------------------------|----------------------------|---------------------------|----------------------------|------------------------------------------|-------------------------------|
| Ac-WITVTIHGKKIRVWTG-NH <sub>2</sub> | 0.99                       | 0.99                      | 0.99                       | 0.99                                     | 0                             |
| Ac-WITVTIHGKKIRVWTG-NH <sub>2</sub> | 0.95                       | 1.02                      | 0.96                       | 0.88                                     | ~0                            |
| +WITVTIHGKKIRVWTG-NH <sub>2</sub>   | 0.76                       | 0.74                      | 0.51                       | 0.11                                     | 8.3                           |
| Ac-TIWVTIHGKKIWRVTG-NH <sub>2</sub> | 0.79                       | 0.79                      | 0.29                       | 0.24                                     | 7.7                           |
| +TIWVTIHGKKIWRVTG-NH <sub>2</sub>   | 0.59                       | 0.64                      | 0.17                       | 0.15                                     | 9.4                           |
| Ac-TITVTIHGKKIRVTTG-NH <sub>2</sub> | 0.38                       | 0.38                      | 0.27                       | NA                                       | 11.8                          |
| Ac-WITATIHGKKARVWTG-NH <sub>2</sub> | 0.77                       | 0.65                      | 0.72                       | 0.71                                     | 9.2                           |
| +WITATIHGKKARVWTG-NH <sub>2</sub>   | 0.13                       | 0.09                      | 0.00                       | 0.00                                     | 16+                           |
| +ATWITVTIHGKKIRVWTG-NH <sub>2</sub> | 0.95                       | 0.91                      | 0.82                       | 0.72                                     | 5.2                           |
| GGWITVTIHGKKIRVWTG-NH <sub>2</sub>  | 0.97                       | 0.94                      | 0.95                       | 0.94                                     | 4.3                           |

<sup>a</sup>All data for 280K, except *italicized entry* (320K). Ac-WITVTIHGKKIRVWTG-NH<sub>2</sub> established as 99% folded at 280K by amide H/D exchange studies. (Including amides near the termini; see Table S2A and Figure S2A.) <sup>b-c</sup> fold diagnostics employed: <sup>b</sup> H7 H<sub>N</sub>, G8 ΔH<sub>α</sub>, K9 H<sub>N</sub>; <sup>c</sup> H<sub>N</sub>: 4-6 & 10-11; H<sub>α</sub>: 4-6 & 9-11; <sup>d</sup> H<sub>N</sub> & H<sub>α</sub> of I2 & V13; <sup>e</sup> Hβ3 and Hε3 of W14/W12. <sup>f</sup> in kJ/mol; vs. Ac-WITVTIHGKKIRVWTG-NH<sub>2</sub>, calculated from the mid-strand value (which uses many diagnostic shifts, and has minimal interference from ring current effects.)

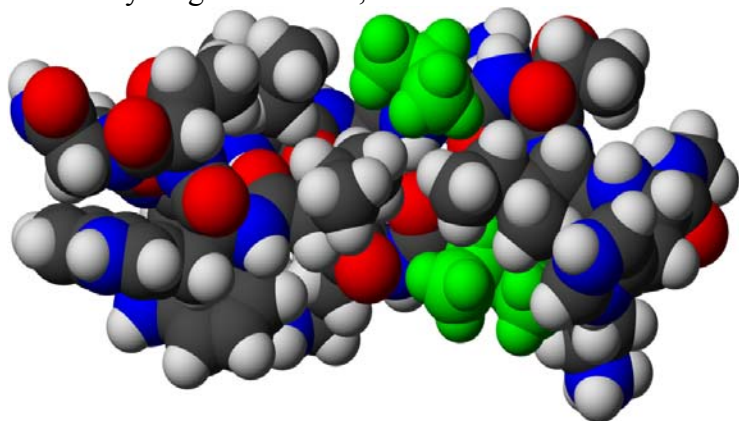

**Figure S3:** The space-filling structure of Ac-WITVTIHGKKIRVWTG-NH<sub>2</sub> with V4 and I11 highlighted in green illustrates why the  $\Delta\Delta G$  of this mutation can be as high as 9.2 kJ/mol (as calculated from strand site shift changes upon mutations); greater even than loss of the cap. Due to the significant twist of the hairpin, V4 and I11 interact more strongly with the sidechains of I2, I6, and V13 than each other. The double alanine mutation doesn't just disrupt a single cross-strand interaction, but an entire hydrophobic core. (Also, removing two beta branched residues significantly lowers the beta propensities of the strands.)

## Supporting Item 4: Applying the $\beta$ -cap to a hairpin reported from the Gellman laboratory

| Table S4                                  | Y4H <sub>N</sub> | V5H <sub>N</sub> | F9H <sub>N</sub> | T10H <sub>N</sub> | Q3H $\alpha$ | Y4H $\alpha$ | K8H $\alpha$ | G16H <sub>N</sub> | Gly $\Delta$ H $\alpha$ | $\chi_F^b$        |
|-------------------------------------------|------------------|------------------|------------------|-------------------|--------------|--------------|--------------|-------------------|-------------------------|-------------------|
| cyc (RWQYVpGKFTVQpG) <sup>a</sup>         | 0.92             | 0.75             | 0.63             | 0.64              | 0.519        | 0.539        | 0.453        |                   | n.a.                    | 0.99              |
| RWQYVNGKFTVQ-NH <sub>2</sub> <sup>a</sup> | 0.32             | 0.17             | 0.19             | 0.14              | 0.099        | 0.139        | 0.163        |                   | 0.28                    | 0.28 <sup>c</sup> |
| RWQYVpGKFTVQ-NH <sub>2</sub> <sup>a</sup> | 0.43             | 0.54             | 0.36             | 0.21              | 0.169        | 0.409        | 0.283        |                   | n.a.                    | 0.54 <sup>c</sup> |
| RWQYVNGKFTPQ-NH <sub>2</sub>              | 0.225            | 0.17             | 0.288            | 0.245             | -0.01        | 0.134        | 0.181        |                   | 0.272                   | 0.26              |
| AcWRWQYVNGKFTPQWTG-NH <sub>2</sub>        | 0.838            | 0.422            | 0.669            | 0.839             | 0.421        | 0.258        | 0.361        | -2.19             | 0.488                   | 0.84              |
| WRWQYVNGKFTPQWTG-NH <sub>2</sub>          | 0.42             | 0.238            | 0.363            | 0.397             | 0.125        | 0.203        | 0.194        | -1.00             | 0.362                   | 0.42              |
| AcTRWQYVNGKFTPQWTG-NH <sub>2</sub>        | 0.331            | 0.168            | 0.297            | 0.328             | 0.071        | 0.199        | 0.161        | -1.03             | 0.314                   | 0.33 <sup>d</sup> |
| TRWQYVNGKFTPQWTG-NH <sub>2</sub>          | 0.368            | 0.193            | 0.312            | 0.358             | 0.098        | 0.188        | 0.156        | -1.02             | 0.312                   | 0.36 <sup>d</sup> |

<sup>a</sup> Data from Espinosa et. al.<sup>22</sup>; 276 K (all other data: 280K)

<sup>b</sup> Calculated by summing the 8 largest mid-strand CSDs and setting cyc(RWQYVpGKFTVQpG) values to 99%. The fraction folded estimates given for the 2<sup>nd</sup> and 3<sup>rd</sup> differ somewhat from the estimates of Gellman and co-workers<sup>c</sup> which relied on the H $\alpha$  CSDs at 4 H-bonded sites (Q3, V5, K8, and T10) rather than the largest CSDs.

<sup>c</sup> The fraction folded values reported by in Gellman paper were 0.61 (pG) and 0.41 (NG).

<sup>d</sup> These two peptides correspond to T1W mutants; Thr is generally viewed as having nearly the same ' $\beta$ -propensity' as Trp. Thus the folding increment ( $\chi_F$  0.33 vs 0.84) provides another measure of the capping effect ( $\Delta\Delta G = 5.7$  kJ/mol). The absence of fold destabilization on deacetylation validates deacetylation as a measure of the capping effect in Ac-WRWQYVNGKFTPQWTG-NH<sub>2</sub>.

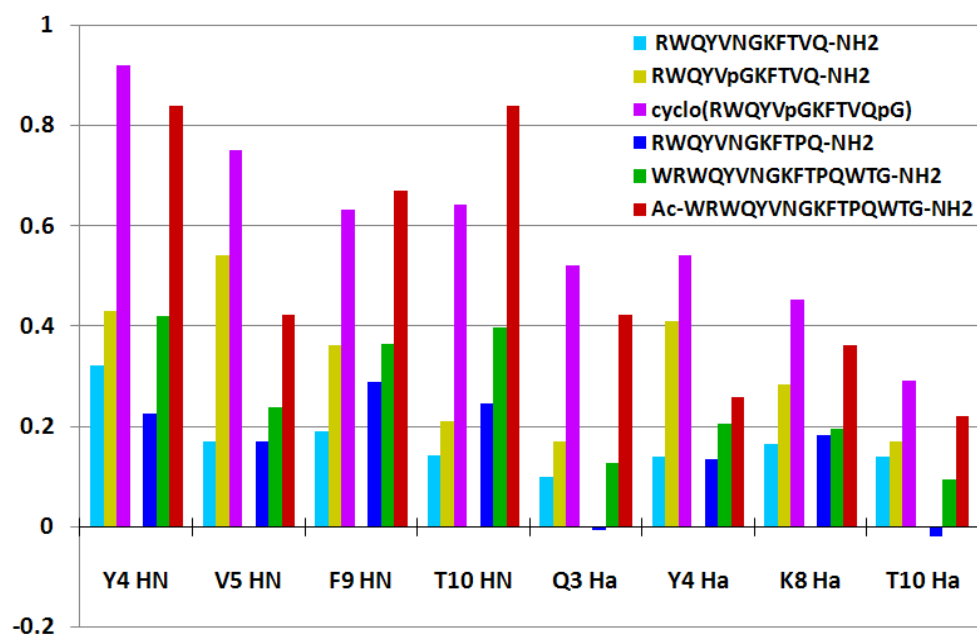

**Figure S4:** Visual representation of CSDs used, including the smaller shifts at T10 H $\alpha$ .

From Fig. S4, the CSDs for Ac-WRWQYVNGKFTPQWTG-NH<sub>2</sub> are 85 $\pm$ 3 % of those observed for Gellman's cyclic 100% folded reference.

## Supporting Information Item 5: Mutations of the Key W/W Pair

Only the most conservative of  $W \rightarrow X$  mutations result in still-viable  $\beta$ -capping motifs.  $W \rightarrow Y$  and  $W \rightarrow F$  mutations were investigated for both the “face” (N-terminal) and “edge” (C-terminal) tryptophans in two different hairpins. Peptides with the “edge” tryptophans mutated to other aromatic residues were only modestly affected, but even the most conservative mutations of the “face” Trp (to Y, F) were significantly destabilizing. (Potential changes in ring current shifts for the 100% CSD values of various  $W \rightarrow X$  mutants makes these values approximate, especially for the shorter system.)

Shaded italics data at 320K, all other data at 280K.

| <b>Table S5A</b>                                   | <b>C-term G H<sub>N</sub><sup>a</sup></b> | <b>I2 H<sub>N</sub><sup>b</sup></b> | <b><math>\chi_F</math> strand<sup>c</sup></b> | <b><math>\Delta\Delta G^d</math></b> |
|----------------------------------------------------|-------------------------------------------|-------------------------------------|-----------------------------------------------|--------------------------------------|
| Pr-WIpGIWTGPS <sup>e</sup>                         | -3.679                                    | 1.457                               | 0.98                                          | (neg.)                               |
| Ac-WIpGKWTG-NH <sub>2</sub>                        | -3.056                                    | 1.344                               | 0.92                                          | 0                                    |
| Ac-YIpGKWTG-NH <sub>2</sub>                        | -1.933                                    | .738                                | ~0.51                                         | ~5.6                                 |
| Ac-WIpGKYTG-NH <sub>2</sub>                        | -1.776                                    | 1.248                               | ~0.85                                         | ~1.6                                 |
| <b>Table S5B</b>                                   | <b>C-term G H<sub>N</sub><sup>a</sup></b> | <b>I4 H<sub>N</sub><sup>b</sup></b> | <b><math>\chi_F</math> strand<sup>f</sup></b> | <b><math>\Delta\Delta G^g</math></b> |
| Ac-WVTIpGKKIWTG-NH <sub>2</sub> <sup>h</sup>       | -2.944                                    | 0.935                               | 0.99                                          | 0                                    |
| Ac-WVTIpGKKIWTG-NH <sub>2</sub>                    | -2.415                                    | 0.901                               | 0.96                                          | 1.9                                  |
| Ac-FVTIpGKKIWTG-NH <sub>2</sub>                    | -1.655                                    | 0.803                               | 0.71                                          | 8.6                                  |
| Ac-FVTIpGKKIWTG-NH <sub>2</sub>                    | -1.374                                    | 0.730                               | 0.66                                          | 8.9                                  |
| Ac-WVTIpGKKIFTG-NH <sub>2</sub>                    | -1.777                                    | 0.906                               | 0.93                                          | 4.7                                  |
| Ac-WVTIpGKKIFTG-NH <sub>2</sub>                    | -1.554                                    | 0.851                               | 0.88                                          | 5.3                                  |
| Ac-WVTIpGKAIFTG-NH <sub>2</sub>                    | -1.990                                    | 0.804                               | 0.88                                          | 5.9                                  |
| Ac-WVTIpGKAILTG-NH <sub>2</sub>                    | 0.053                                     | 0.674                               | 0.63                                          | 9.4                                  |
| Ac-WVTIpGKAIGHTG-NH <sub>2</sub> (H <sup>+</sup> ) | 0.120                                     | 0.713                               | 0.67                                          | 9.0                                  |
| Ac-WVTIpGKAIGHTG-NH <sub>2</sub> (H <sup>+</sup> ) | 0.126                                     | 0.619                               | 0.58                                          | 9.8                                  |
| Ac-WVTIpGKAIGHTG-NH <sub>2</sub> (H <sup>0</sup> ) | -0.071                                    | 0.697                               | 0.64                                          | 9.3                                  |

<sup>a</sup>Not a precise diagnostic of fold population; 100% folded value varies with changing i-2 residues. “Unfolded” value of Ac-WTG-NH<sub>2</sub> is ~1.2 ppm.

<sup>b</sup>A large positive I4 H<sub>N</sub> CSD is indicative of cross-strand H-bond formation; it is a good turn/strand diagnostic free of ring current effects. I/V2 and I9 are similar, but with minor interference from ring current effects.

<sup>c</sup>Calculated from the I2 H<sub>N</sub> value (significant changes in ring current shifts expected.)

<sup>d</sup>versus Ac-WIpGKWTG-NH<sub>2</sub>

<sup>e</sup>Determined to be 98% folded by amide exchange experiments at 280K<sup>2</sup>

<sup>f</sup>Calculated from the five strand protons with the largest chemical shift deviations: V2 H<sub>N</sub>, T3 H $\alpha$ , I4 H<sub>N</sub>, K8 H $\alpha$ , and I9 H<sub>N</sub> (modest changes in ring current shifts expected)

<sup>g</sup>versus Ac-WVTIpGKKIWTG-NH<sub>2</sub>

<sup>h</sup>Determined to be 99% folded by amide exchange experiments at 280K (see figure and table S2B, above.)



**Supporting Information Item 6: Structural Data: NMR-derived representative structures of Ac-WVTIpGKHIFTG-NH<sub>2</sub> and Ac-WITVTIHGKKIRVWTG-NH<sub>2</sub>, and distance constraints for Ac-WITVTIHGKKIRVWTG-NH<sub>2</sub>**

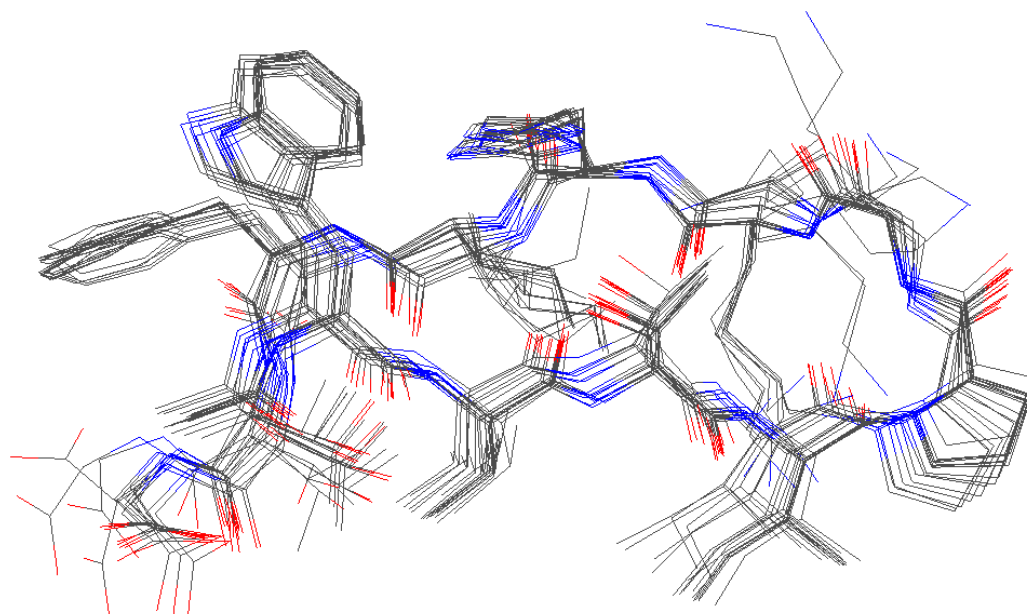

**Figure S6A:** (above) Preliminary NOE-derived Structure Ensemble of Ac-WVTIpGKHIFTG-NH<sub>2</sub>, illustrating similar geometry in the W/F capping interaction vs. the W/W. (Better NOE data was obtained for the K8H mutant.)

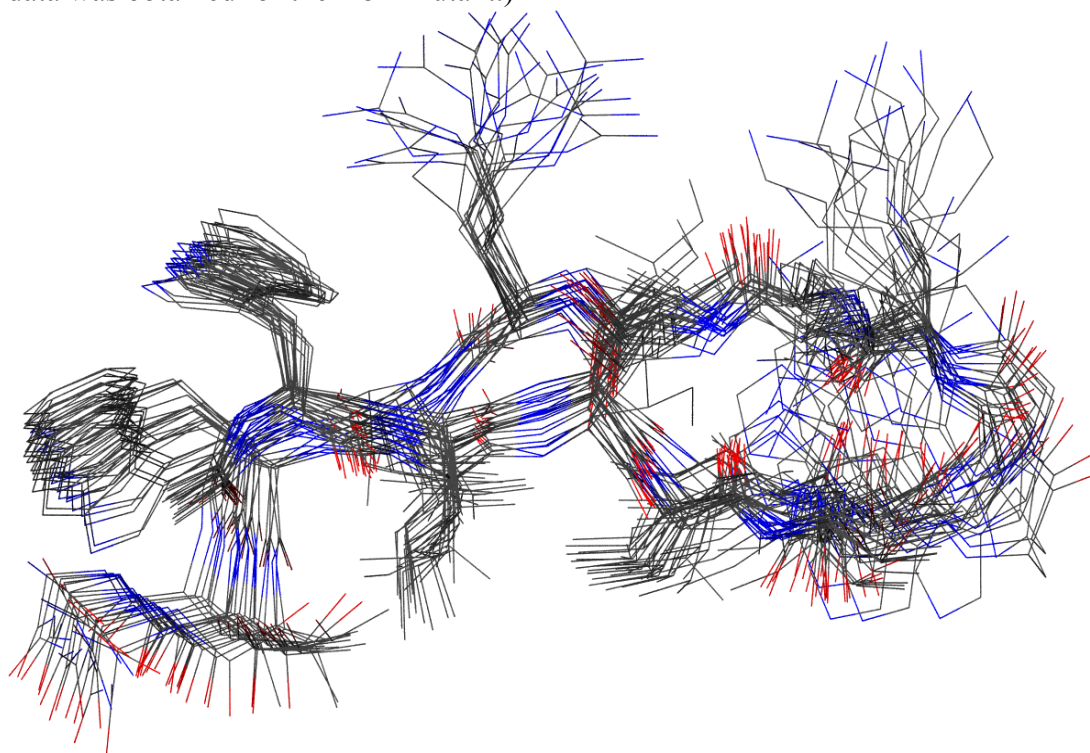

**Figure S6B:** 36/50 lowest energy structures of Ac-WITVTIHGKKIRVWTG-NH<sub>2</sub>



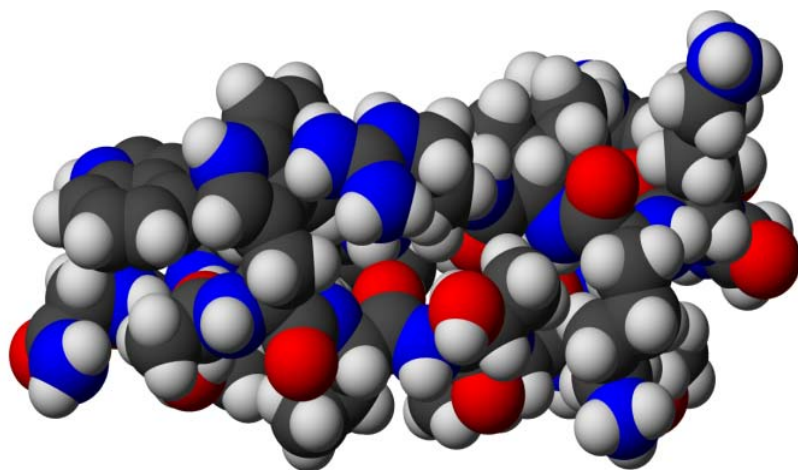

**Figure S6C:** Space-filling model of the lowest energy structure from above. (The opposite face of the same structure is shown as Figure S3.)

**Table S6:** Distance Constraints for the NMR Structure of Ac-WITVTIHGKKIRVWTG-NH<sub>2</sub>  
Long-range constraints ( $|i-j|>5$ ) in **bold**.

Intra-residue constraints in *italics*. (N-term Ac- counted as part of W1)

#denotes shift-coincident methyl or germinal methylene protons

\*denotes stereotopically ambiguous methylene protons

|    |             |    |             |      |      |      |
|----|-------------|----|-------------|------|------|------|
| 10 | <i>hb2</i>  | 10 | <i>hn</i>   | 2.56 | 0.29 | 0.25 |
| 10 | <i>ha</i>   | 10 | <i>hn</i>   | 2.80 | 0.51 | 0.46 |
| 10 | <i>hb1</i>  | 10 | <i>ha</i>   | 2.72 | 0.35 | 0.28 |
| 10 | <i>hg2</i>  | 10 | <i>hn</i>   | 3.24 | 0.51 | 0.41 |
| 10 | <i>ha</i>   | 11 | <i>hn</i>   | 2.13 | 0.16 | 0.18 |
| 10 | <i>ha</i>   | 6  | <i>hn</i>   | 3.11 | 0.47 | 0.37 |
| 11 | <i>ha</i>   | 11 | <i>hn</i>   | 2.84 | 0.38 | 0.31 |
| 11 | <i>hb</i>   | 11 | <i>hn</i>   | 2.94 | 0.41 | 0.33 |
| 11 | <i>ha</i>   | 11 | <i>hb</i>   | 2.99 | 0.43 | 0.34 |
| 11 | <i>hg11</i> | 11 | <i>hn</i>   | 3.16 | 0.48 | 0.39 |
| 11 | <i>hg12</i> | 11 | <i>hn</i>   | 3.29 | 0.52 | 0.43 |
| 11 | <i>ha</i>   | 11 | <i>hg2#</i> | 3.36 | 0.64 | 0.56 |
| 11 | <i>ha</i>   | 11 | <i>hd1#</i> | 3.58 | 0.51 | 0.41 |
| 11 | <i>hg2#</i> | 11 | <i>hn</i>   | 3.97 | 0.64 | 0.52 |
| 11 | <i>ha</i>   | 12 | <i>hn</i>   | 2.12 | 0.15 | 0.18 |
| 11 | <i>hg2#</i> | 12 | <i>hn</i>   | 3.47 | 0.68 | 0.38 |
| 12 | <i>hb*</i>  | 12 | <i>hn</i>   | 2.65 | 0.32 | 0.27 |
| 12 | <i>hg*</i>  | 12 | <i>hn</i>   | 2.73 | 0.35 | 0.28 |
| 12 | <i>ha</i>   | 12 | <i>hn</i>   | 2.91 | 0.40 | 0.32 |
| 12 | <i>ha</i>   | 12 | <i>hg*</i>  | 3.06 | 0.50 | 0.50 |
| 12 | <i>ha</i>   | 12 | <i>hb*</i>  | 3.06 | 0.50 | 0.50 |

|           |             |          |             |             |             |             |
|-----------|-------------|----------|-------------|-------------|-------------|-------------|
| 12        | hg*         | 12       | he          | 3.02        | 0.44        | 0.35        |
| 12        | hd2         | 12       | he          | 3.10        | 0.47        | 0.37        |
| 12        | hd1         | 12       | he          | 3.20        | 0.50        | 0.40        |
| 12        | ha          | 13       | hn          | 2.19        | 0.18        | 0.19        |
| 12        | hb*         | 13       | hn          | 3.25        | 0.51        | 0.42        |
| <b>12</b> | <b>hb*</b>  | <b>1</b> | <b>he3</b>  | <b>2.82</b> | <b>0.38</b> | <b>0.50</b> |
| <b>12</b> | <b>hg*</b>  | <b>1</b> | <b>he3</b>  | <b>2.95</b> | <b>0.42</b> | <b>0.53</b> |
| <b>12</b> | <b>hg*</b>  | <b>3</b> | <b>ha</b>   | <b>3.60</b> | <b>1.00</b> | <b>1.00</b> |
| <b>12</b> | <b>hg*</b>  | <b>3</b> | <b>hg2#</b> | <b>3.60</b> | <b>1.00</b> | <b>1.00</b> |
| <b>12</b> | <b>ha</b>   | <b>3</b> | <b>hg2#</b> | <b>3.60</b> | <b>1.00</b> | <b>1.00</b> |
| <b>12</b> | <b>ha</b>   | <b>4</b> | <b>hn</b>   | <b>3.16</b> | <b>0.49</b> | <b>0.39</b> |
| 13        | ha          | 13       | hn          | 2.85        | 0.39        | 0.31        |
| 13        | hb          | 13       | hn          | 2.89        | 0.60        | 0.52        |
| 13        | ha          | 13       | hb          | 2.98        | 0.43        | 0.34        |
| 13        | hg2#        | 13       | hn          | 3.58        | 0.81        | 0.71        |
| 13        | hg1#        | 13       | hn          | 4.01        | 0.65        | 0.53        |
| 13        | ha          | 14       | hn          | 2.09        | 0.15        | 0.18        |
| 13        | hb          | 14       | hn          | 3.16        | 0.48        | 0.39        |
| 13        | hg1#        | 14       | hn          | 3.52        | 0.49        | 0.39        |
| <b>13</b> | <b>ha</b>   | <b>1</b> | <b>hz3</b>  | <b>3.04</b> | <b>0.45</b> | <b>0.56</b> |
| 14        | he1         | 14       | hd1         | 2.14        | 0.16        | 0.58        |
| 14        | hb1         | 14       | hn          | 2.45        | 0.26        | 0.23        |
| 14        | hb1         | 14       | hd1         | 2.57        | 0.30        | 0.45        |
| 14        | ha          | 14       | hn          | 2.92        | 0.41        | 0.33        |
| 14        | ha          | 14       | hb2         | 2.81        | 0.44        | 0.35        |
| 14        | he3         | 14       | ha          | 3.25        | 0.51        | 0.61        |
| 14        | he3         | 14       | hb2         | 2.85        | 0.51        | 0.61        |
| 14        | ha          | 14       | hd1         | 3.61        | 0.53        | 0.93        |
| 14        | ha          | 15       | hn          | 2.30        | 0.21        | 0.21        |
| 14        | he3         | 15       | hn          | 3.25        | 0.58        | 0.68        |
| <b>14</b> | <b>hz3</b>  | <b>1</b> | <b>hd1</b>  | <b>2.72</b> | <b>0.35</b> | <b>0.68</b> |
| <b>14</b> | <b>he3</b>  | <b>1</b> | <b>hd1</b>  | <b>3.19</b> | <b>0.49</b> | <b>0.80</b> |
| <b>14</b> | <b>he3</b>  | <b>1</b> | <b>he1</b>  | <b>3.40</b> | <b>1.00</b> | <b>1.00</b> |
| <b>14</b> | <b>hb2</b>  | <b>1</b> | <b>hz3</b>  | <b>3.30</b> | <b>0.53</b> | <b>0.63</b> |
| <b>14</b> | <b>hb2</b>  | <b>1</b> | <b>hh2</b>  | <b>3.60</b> | <b>1.00</b> | <b>1.00</b> |
| <b>14</b> | <b>ha</b>   | <b>1</b> | <b>he3</b>  | <b>3.35</b> | <b>0.54</b> | <b>0.65</b> |
| <b>14</b> | <b>ha</b>   | <b>2</b> | <b>hn</b>   | <b>3.52</b> | <b>0.60</b> | <b>0.51</b> |
| 15        | ha          | 13       | hg1#        | 3.92        | 0.92        | 0.80        |
| 15        | ha          | 15       | hn          | 2.81        | 0.37        | 0.30        |
| 15        | ha          | 15       | hg2#        | 2.93        | 0.31        | 0.28        |
| 15        | hb          | 15       | hn          | 3.40        | 0.46        | 0.67        |
| 15        | hg2#        | 15       | hn          | 3.41        | 0.76        | 0.67        |
| <b>15</b> | <b>hg2#</b> | <b>2</b> | <b>hd1#</b> | <b>2.80</b> | <b>0.80</b> | <b>0.65</b> |
| <b>15</b> | <b>hg2#</b> | <b>2</b> | <b>hg1*</b> | <b>2.80</b> | <b>0.80</b> | <b>0.65</b> |
| 15        | hg2#        | 16       | hn          | 3.60        | 0.30        | 1.50        |
| 16        | ha*         | 14       | he1         | 2.93        | 0.41        | 0.53        |
| 16        | ha*         | 14       | hz2         | 2.98        | 0.43        | 0.54        |
| 16        | ha*         | 14       | hd1         | 3.43        | 0.57        | 0.67        |
| 16        | hn          | 15       | hn          | 2.53        | 0.29        | 0.25        |
| 16        | hn          | 15       | ha          | 3.32        | 0.53        | 0.44        |
| 16        | hn          | 16       | ha*         | 2.26        | 0.20        | 0.20        |
| <b>16</b> | <b>ha*</b>  | <b>1</b> | <b>ha#</b>  | <b>2.86</b> | <b>0.39</b> | <b>0.31</b> |

|           |             |           |            |             |             |             |
|-----------|-------------|-----------|------------|-------------|-------------|-------------|
| <b>16</b> | <b>hn</b>   | <b>1</b>  | <b>ha#</b> | <b>3.18</b> | <b>0.49</b> | <b>0.39</b> |
| 16        | ha*         | 16        | h1         | 3.20        | 0.50        | 0.40        |
| <b>1</b>  | <b>he3</b>  | <b>13</b> | <b>hn</b>  | <b>3.17</b> | <b>0.49</b> | <b>0.59</b> |
| <b>1</b>  | <b>hz3</b>  | <b>14</b> | <b>hn</b>  | <b>3.07</b> | <b>0.46</b> | <b>0.56</b> |
| <b>1</b>  | <b>hn</b>   | <b>14</b> | <b>hz3</b> | <b>3.25</b> | <b>0.51</b> | <b>0.61</b> |
| <b>1</b>  | <b>ha</b>   | <b>14</b> | <b>ha</b>  | <b>3.26</b> | <b>0.52</b> | <b>0.42</b> |
| <b>1</b>  | <b>he1</b>  | <b>14</b> | <b>hz3</b> | <b>3.27</b> | <b>0.52</b> | <b>0.82</b> |
| <b>1</b>  | <b>ha</b>   | <b>15</b> | <b>hn</b>  | <b>2.94</b> | <b>0.41</b> | <b>0.33</b> |
| 1         | hb2         | 1         | hn         | 2.58        | 0.30        | 0.25        |
| 1         | hb2         | 1         | hd1        | 2.61        | 0.31        | 0.46        |
| 1         | ha          | 1         | he3        | 2.79        | 0.37        | 0.50        |
| 1         | hb1         | 1         | he3        | 2.84        | 0.38        | 0.51        |
| 1         | hd1         | 1         | hn         | 2.90        | 0.40        | 0.52        |
| 1         | ha          | 1         | hn         | 2.99        | 0.43        | 0.34        |
| 1         | ha          | 2         | hn         | 2.20        | 0.18        | 0.19        |
| 1         | hb1         | 2         | hn         | 3.19        | 0.49        | 0.40        |
| 1         | he3         | 2         | hn         | 3.28        | 0.52        | 0.62        |
| 1         | ha#         | 1         | hn         | 2.28        | 0.21        | 0.20        |
| 1         | ha#         | 1         | hd1        | 3.23        | 0.51        | 0.41        |
| <b>1</b>  | <b>ha#</b>  | <b>14</b> | <b>hh2</b> | <b>3.28</b> | <b>0.52</b> | <b>0.42</b> |
| <b>1</b>  | <b>ha#</b>  | <b>14</b> | <b>hz3</b> | <b>2.87</b> | <b>0.39</b> | <b>0.31</b> |
| <b>1</b>  | <b>ha#</b>  | <b>15</b> | <b>hn</b>  | <b>3.24</b> | <b>0.51</b> | <b>0.41</b> |
| <b>1</b>  | <b>ha#</b>  | <b>16</b> | <b>h1</b>  | <b>3.32</b> | <b>0.53</b> | <b>0.44</b> |
| <b>2</b>  | <b>hn</b>   | <b>13</b> | <b>hn</b>  | <b>2.83</b> | <b>0.38</b> | <b>0.31</b> |
| 2         | ha          | 2         | hb         | 2.69        | 0.33        | 0.27        |
| 2         | ha          | 2         | hn         | 2.87        | 0.46        | 0.39        |
| 2         | hg1*        | 2         | hn         | 2.85        | 0.39        | 0.31        |
| 2         | hg1*        | 2         | hn         | 3.07        | 0.46        | 0.36        |
| 2         | hb          | 2         | hn         | 3.25        | 0.51        | 0.41        |
| 2         | hg2#        | 2         | hn         | 3.78        | 0.58        | 0.46        |
| 2         | ha          | 3         | hn         | 2.18        | 0.18        | 0.19        |
| 2         | hb          | 3         | hn         | 2.56        | 0.29        | 0.25        |
| <b>3</b>  | <b>hg2#</b> | <b>11</b> | <b>hn</b>  | <b>3.71</b> | <b>0.56</b> | <b>0.44</b> |
| <b>3</b>  | <b>ha</b>   | <b>13</b> | <b>hn</b>  | <b>3.03</b> | <b>0.44</b> | <b>0.35</b> |
| 3         | hb          | 3         | hn         | 2.53        | 0.28        | 0.24        |
| 3         | hb          | 3         | ha         | 3.6         | 0.4         | 1.0         |
| <b>3</b>  | <b>hg2#</b> | <b>10</b> | <b>hb1</b> | <b>2.76</b> | <b>0.36</b> | <b>0.29</b> |
| <b>3</b>  | <b>hg2#</b> | <b>10</b> | <b>ha</b>  | <b>3.60</b> | <b>1.00</b> | <b>1.00</b> |
| 3         | ha          | 3         | hn         | 3.05        | 0.45        | 0.36        |
| 3         | ha          | 4         | hn         | 2.13        | 0.16        | 0.18        |
| 3         | hg2#        | 4         | hn         | 3.46        | 0.48        | 0.38        |
| 3         | hb          | 4         | hn         | 3.47        | 0.58        | 0.49        |
| 3         | hg2#        | 3         | hn         | 3.6         | 0.6         | 0.5         |
| <b>4</b>  | <b>hn</b>   | <b>11</b> | <b>hn</b>  | <b>2.86</b> | <b>0.39</b> | <b>0.31</b> |
| 4         | ha          | 4         | hn         | 2.82        | 0.35        | 0.28        |
| 4         | ha          | 4         | hb         | 2.76        | 0.36        | 0.29        |
| 4         | ha          | 4         | hg1#       | 3.00        | 0.56        | 0.41        |
| 4         | hg2#        | 4         | hn         | 3.25        | 0.41        | 0.33        |
| 4         | hb          | 4         | hn         | 4.0         | 0.5         | 0.8         |
| 4         | ha          | 5         | hn         | 2.17        | 0.17        | 0.19        |
| 4         | hb          | 5         | hn         | 2.64        | 0.32        | 0.26        |
| 5         | hg2#        | 8         | hn         | 3.27        | 0.41        | 0.34        |

| <b>5</b> | <b>ha</b> | <b>11</b> | <b>hn</b> | <b>3.23</b> | <b>0.51</b> | <b>0.41</b> |
|----------|-----------|-----------|-----------|-------------|-------------|-------------|
| 5        | hb        | 5         | hn        | 2.47        | 0.27        | 0.23        |
| 5        | hb        | 5         | ha        | 3.5         | 0.35        | 1.0         |
| 5        | ha        | 5         | hn        | 2.93        | 0.41        | 0.33        |
| 5        | ha        | 5         | hg2#      | 3.04        | 0.54        | 0.29        |
| 5        | hg2#      | 5         | hn        | 3.78        | 0.58        | 0.46        |
| 5        | ha        | 6         | hn        | 2.19        | 0.18        | 0.14        |
| 5        | hg2#      | 6         | hn        | 3.46        | 0.47        | 0.38        |
| 5        | hg2#      | 9         | hn        | 3.77        | 0.57        | 0.46        |
| 6        | hb        | 6         | hn        | 2.92        | 0.41        | 0.33        |
| 6        | ha        | 6         | hn        | 3.05        | 0.42        | 0.33        |
| 6        | ha        | 6         | hb        | 3.07        | 0.45        | 0.36        |
| 6        | ha        | 6         | hg2#      | 3.13        | 0.37        | 0.31        |
| 6        | hg12      | 6         | hn        | 3.27        | 0.52        | 0.42        |
| 6        | ha        | 6         | hd1#      | 3.60        | 0.52        | 0.41        |
| 6        | hg2#      | 6         | hn        | 4.21        | 0.71        | 0.60        |
| 6        | ha        | 7         | hn        | 2.10        | 0.15        | 0.18        |
| 6        | hg2#      | 7         | hd2       | 3.38        | 0.45        | 0.60        |
| 6        | hg2#      | 7         | hn        | 3.40        | 0.46        | 0.37        |
| 6        | hg2#      | 8         | hn        | 4.14        | 0.69        | 0.57        |
| 7        | hb2       | 6         | hg2#      | 4.03        | 0.65        | 0.54        |
| 7        | ha        | 7         | hn        | 2.15        | 0.16        | 0.19        |
| 7        | ha        | 7         | hd2       | 3.37        | 0.55        | 0.65        |
| 7        | hb1       | 7         | hd2       | 3.38        | 0.56        | 0.66        |
| 7        | hb1       | 7         | hn        | 3.39        | 0.56        | 0.46        |
| 7        | hb2       | 7         | hd2       | 3.42        | 0.57        | 0.67        |
| 7        | hb2       | 7         | hn        | 3.43        | 0.57        | 0.47        |
| 7        | hb1       | 7         | ha        | 3.00        | 0.6         | 0.5         |
| 7        | ha        | 8         | hn        | 2.59        | 0.30        | 0.26        |
| 8        | ha2       | 5         | hg2#      | 3.40        | 0.46        | 0.37        |
| 8        | hn        | 7         | hn        | 2.97        | 0.42        | 0.34        |
| 8        | ha2       | 8         | hn        | 2.40        | 0.24        | 0.22        |
| 8        | ha1       | 8         | hn        | 2.83        | 0.38        | 0.30        |
| 8        | ha2       | 9         | hn        | 3.27        | 0.52        | 0.42        |
| 9        | ha        | 10        | hn        | 2.08        | 0.14        | 0.18        |
| 9        | hb2       | 10        | hn        | 3.08        | 0.46        | 0.36        |
| 9        | hn        | 6         | hn        | 2.76        | 0.36        | 0.29        |
| 9        | hn        | 8         | hn        | 2.82        | 0.38        | 0.30        |
| 9        | ha        | 9         | hn        | 2.84        | 0.38        | 0.31        |
| 9        | hb2       | 9         | hn        | 2.86        | 0.39        | 0.31        |
| 9        | hb1       | 9         | hn        | 2.91        | 0.40        | 0.32        |

**Supporting Information Item 7: Chemical Shift Data for Selected Peptides at 280K (unless otherwise specified). Large upfield ring current shift appear in bold.**

**Table S7A:** Ac-WINGKWTG-NH<sub>2</sub>

| # | Res | H <sub>N</sub> | H <sub>α</sub> | H <sub>β</sub> (H <sub>β</sub> ') | Others                                                                  | <sup>13</sup> C <sub>α</sub> | <sup>13</sup> C <sub>β</sub> |
|---|-----|----------------|----------------|-----------------------------------|-------------------------------------------------------------------------|------------------------------|------------------------------|
| 0 | Ac  |                | 1.647          |                                   |                                                                         | 24.53                        |                              |
| 1 | Trp | 8.810          | 4.930          | 3.156,3.113                       | ε1:10.230, δ1:7.420, ε3: 7.201<br>ζ3:7.164, η2:7.173, ζ2:7.327          | 57.29                        | 29.22                        |
| 2 | Ile | 8.975          | 4.323          | 1.722                             | γ:1.372,1.068,0.856, δ:0.813                                            | 60.35                        | 39.71                        |
| 3 | Asn | 9.573          | 4.448          | 3.077,2.757                       | δ:7.776,7.037                                                           | 53.92                        | 37.49                        |
| 4 | Gly | 8.848          | 4.155,3.751    |                                   |                                                                         | 45.4                         |                              |
| 5 | Lys | 8.025          | 4.782          | 1.821,1.771                       | γ:1.441,1.367, δ:1.697, ε:3.010                                         | 54.59                        | 34.82                        |
| 6 | Trp | 8.848          | 4.181          | <b>2.826,2.044</b>                | ε1:10.223, δ1:6.880, ε3: <b>6.024</b> ,<br>ζ3:6.900, η2:7.173, ζ2:7.385 | 56.71                        | 28.56                        |
| 7 | Thr | 7.869          | 4.207          | 4.155                             | γ: 1.086 (Me)                                                           | 61.45                        | 70.07                        |
| 8 | Gly | <b>5.603</b>   | 3.399,3.399    |                                   | Term NH <sub>2</sub> cis: 7.205 trans: 7.329                            | 44.53                        |                              |

**Table S7B:** Ac-WVSINGKKIWTG-NH<sub>2</sub>

| #  | Res | H <sub>N</sub> | H <sub>α</sub> | H <sub>β</sub> (H <sub>β</sub> ') | Others                                                    |
|----|-----|----------------|----------------|-----------------------------------|-----------------------------------------------------------|
| 0  | Ac  |                | 1.508          |                                   |                                                           |
| 1  | Trp | 8.684          | 5.217          | 3.157,3.050                       | Hδ:7.467,Hε:10.313,7.456,Hζ:7.351,7.148,Hη:7.227          |
| 2  | Val | 9.290          | 4.533          | 2.047                             | Hγ:0.871,0.871                                            |
| 3  | Ser | 8.633          | 5.231          | 3.735,3.631                       |                                                           |
| 4  | Ile | 8.958          | 4.325          | 1.772                             | Hγ:1.458,1.089,0.881,Hδ:0.825                             |
| 5  | Asn | 9.606          | 4.428          | 3.086,2.775                       | Hδ:7.037,7.753                                            |
| 6  | Gly | 8.636          | 4.129,3.578    |                                   |                                                           |
| 7  | Lys | 7.827          | 4.592          | 1.874,1.812                       | Hγ:1.459,1.393,Hδ:1.717,na,Hε:3.032                       |
| 8  | Lys | 8.609          | 4.925          | 1.691,                            | Hγ:1.390,1.258,Hδ:1.318,na,Hε:2.515,2.439                 |
| 9  | Ile | 9.400          | 4.641          | 1.871                             | Hγ:1.479,1.290,0.873,Hδ:0.833                             |
| 10 | Trp | 8.964          | 4.354          | <b>2.856,2.077</b>                | Hδ:6.810,Hε:10.178, <b>5.797</b> ,Hζ:7.351,6.744,Hη:7.128 |
| 11 | Thr | 7.926          | 4.232          | 4.167                             | Hγ: 1.067 (Me)                                            |
| 12 | Gly | <b>5.604</b>   | 3.396,3.344    |                                   |                                                           |

**Table S7C:** Ac-WTVSINGKKITWTG-NH<sub>2</sub>

| #  | Res | H <sub>N</sub> | H <sub>α</sub> | H <sub>β</sub> (H <sub>β</sub> <sup>'</sup> ) | Others                                                                 |
|----|-----|----------------|----------------|-----------------------------------------------|------------------------------------------------------------------------|
| 0  | Ac  |                | 1.904          |                                               |                                                                        |
| 1  | Trp | 8.292          | 4.810          | 3.256,3.179                                   | (overlapped; essentially random coil)                                  |
| 2  | Thr | 8.374          | 4.461          | 4.086                                         | H <sub>γ</sub> : 1.105 (Me)                                            |
| 3  | Val | 8.357          | 4.255          | 2.001                                         | H <sub>γ</sub> : 0.932 (Me)                                            |
| 4  | Ser | 8.602          | 4.610          | 3.889,3.819                                   |                                                                        |
| 5  | Ile | 8.544          | 4.192          | 1.862                                         | H <sub>γ</sub> :1.453,1.180,0.910,H <sub>δ</sub> :0.878                |
| 6  | Asn | 8.648          | 4.677          | 2.890,2.772                                   | H <sub>δ</sub> :7.740,7.039                                            |
| 7  | Gly | 8.409          | 4.001,3.800    |                                               |                                                                        |
| 8  | Lys | 8.025          | 4.354          | 1.818,1.759                                   | H <sub>γ</sub> :na, H <sub>δ</sub> :na, H <sub>ε</sub> :2.965          |
| 9  | Lys | 8.492          | 4.426          | 1.706,                                        | H <sub>γ</sub> :1.402,1.277, H <sub>δ</sub> :na, H <sub>ε</sub> :2.849 |
| 10 | Ile | 8.636          | 4.319          | 1.828                                         | H <sub>γ</sub> :na,1.158,0.799,H <sub>δ</sub> :na                      |
| 11 | Thr | 8.427          | 4.461          | 4.117                                         | H <sub>γ</sub> : 1.164 (Me)                                            |
| 12 | Trp | 8.600          | 4.744          | 3.179,3.058                                   | (overlapped; essentially random coil)                                  |
| 13 | Thr | 8.157          | 4.216          | 4.158                                         | H <sub>γ</sub> : 1.087 (Me)                                            |
| 14 | Gly | 7.153          | 3.606,3.523    |                                               |                                                                        |

**Table S7D:** Ac-WLSVTINGKTIKVWTG-NH<sub>2</sub>

| #  | Res | H <sub>N</sub> | H <sub>α</sub> | H <sub>β</sub> (H <sub>β</sub> <sup>'</sup> ) | Others                                                                                                        |
|----|-----|----------------|----------------|-----------------------------------------------|---------------------------------------------------------------------------------------------------------------|
| 0  | Ac  |                | 1.471          |                                               |                                                                                                               |
| 1  | Trp | 8.671          | 5.128          | 3.160,3.051                                   | H <sub>δ</sub> :7.488,H <sub>ε</sub> :10.348,7.426,H <sub>ζ</sub> :7.343,7.154,H <sub>η</sub> :7.224          |
| 2  | Leu | 9.537          | 4.755          |                                               | H <sub>γ</sub> :1.599,H <sub>δ</sub> :0.920,0.875                                                             |
| 3  | Ser | 8.734          | 5.221          | 3.710,                                        |                                                                                                               |
| 4  | Val | 9.155          | 4.471          | 2.022                                         |                                                                                                               |
| 5  | Thr | 8.781          | 5.115          | 3.878                                         | H <sub>γ</sub> : 0.991 (Me)                                                                                   |
| 6  | Ile | 8.937          | 4.314          |                                               | H <sub>γ</sub> :na,na,0.881, H <sub>δ</sub> :na                                                               |
| 7  | Asn | 9.710          | 4.393          | 3.081,2.759                                   | H <sub>δ</sub> :7.027,7.750                                                                                   |
| 8  | Gly | 8.635          | 4.113,3.544    |                                               |                                                                                                               |
| 9  | Lys | 7.851          | 4.704          | 1.854,1.795                                   | H <sub>γ</sub> :na, H <sub>δ</sub> :na, H <sub>ε</sub> :3.005                                                 |
| 10 | Thr | 8.906          | 4.967          | 3.909                                         | H <sub>γ</sub> : 1.085 (Me)                                                                                   |
| 11 | Ile | 9.335          | 4.540          | 1.890                                         | H <sub>γ</sub> :na,na,0.899, H <sub>δ</sub> :na                                                               |
| 12 | Lys | 8.441          | 5.325          | 1.710,1.649                                   | H <sub>γ</sub> :1.385,na,H <sub>δ</sub> :1.327,1.294,H <sub>ε</sub> :2.534,2.500                              |
| 13 | Val | 9.465          | 4.679          | 2.071                                         | H <sub>γ</sub> :na,na                                                                                         |
| 14 | Trp | 9.111          | 4.328          | <b>2.853,2.135</b>                            | H <sub>δ</sub> :6.814,H <sub>ε</sub> :10.172, <b>5.607</b> ,H <sub>ζ</sub> :7.335,6.624,H <sub>η</sub> :7.105 |
| 15 | Thr | 7.903          | 4.212          | 4.143                                         | H <sub>γ</sub> : 1.059 (Me)                                                                                   |
| 16 | Gly | <b>5.512</b>   | 3.370,         |                                               |                                                                                                               |

**Table S7E:** Ac-WRWWKVVWipGKWIQVPQWTG-NH<sub>2</sub> (more complete data exists for 300K.)

| #  | Res  | H <sub>N</sub> | H <sub>α</sub> | H <sub>β</sub> (H <sub>β</sub> <sup>'</sup> ) | Others                                                   |
|----|------|----------------|----------------|-----------------------------------------------|----------------------------------------------------------|
| 0  | Ac   |                | 1.583          |                                               |                                                          |
| 1  | Trp  |                |                |                                               | Hδ:na; (essentially random coil)                         |
| 2  | Arg  | 9.132          | 4.712          | 1.798,                                        | Hγ:1.560,1.478, Hδ:3.142,na, Hε:7.084                    |
| 3  | Trp  | 8.872          | 5.127          | 3.068,3.068                                   | Hδ:na,Hε:na,na,Hζ:na,na,Hη:na                            |
| 4  | Val  | 9.383          | 4.600          | 2.105                                         | Hγ:0.928,0.897                                           |
| 5  | Lys  | 8.554          | 5.198          | 1.714,                                        | Hγ:1.429 Hδ:1.303, Hε:2.430, Hζ:7.228                    |
| 6  | Val  | 9.526          | 4.792          |                                               | Hγ:na,na                                                 |
| 7  | Trp  | 8.628          | 4.684          | <b>2.881,1.715</b>                            | Hδ:6.701,Hε:9.972, <b>5.738</b> ,Hζ:7.255,6.605,Hη:6.993 |
| 8  | Ile  | 8.759          | 4.522          | 1.638                                         | Hγ:na,na,0.754,Hδ:na                                     |
| 9  | dPro |                | 4.139          | 1.819,2.241                                   | Hγ:1.957,1.959,Hδ:3.625,3.643                            |
| 10 | Gly  |                | 3.728,3.042    |                                               |                                                          |
| 11 | Lys  | 6.873          | 4.312          | 1.689,1.573                                   | Hγ:1.228, Hδ:1.608, Hε:2.934, Hζ:7.583                   |
| 12 | Trp  | 8.474          | 5.353          | 3.109,2.847                                   | Hδ:7.415,Hε:10.202,7.338,Hζ:7.255,na,Hη:na               |
| 13 | Ile  | 9.606          | 4.659          | 1.933                                         | Hγ:na,na,0.922, Hδ:na                                    |
| 14 | Gln  | 8.574          | 5.297          |                                               | Hγ:2.331, Hε:na,na                                       |
| 15 | Val  | 9.566          | 5.044          |                                               | Hγ:na,na                                                 |
| 16 | Pro  |                |                |                                               | Hγ:na, Hδ:na                                             |
| 17 | Gln  | 9.370          | 4.781          |                                               | Hγ:na, Hε:na,na                                          |
| 18 | Trp  |                | 4.279          | <b>2.926,2.016</b>                            | Hδ:na, Hε:3: <b>5.950</b> , Hζ:7.349,6.759, Hη:7.128     |
| 19 | Thr  | 7.864          | 4.181          | 4.093                                         | Hγ: 0.996 (Me)                                           |
| 20 | Gly  | <b>5.982</b> , | 3.395          |                                               |                                                          |

**Table S7F:** Ac-WITVTIHGKKIRVWTG-NH<sub>2</sub> (99% folded by amide H/D exchange)

| #  | Res | H <sub>N</sub> | H <sub>α</sub>  | H <sub>β</sub> (H <sub>β</sub> <sup>'</sup> ) | Others                                                 | <sup>13</sup> C <sub>α</sub> | <sup>13</sup> C <sub>β</sub> |
|----|-----|----------------|-----------------|-----------------------------------------------|--------------------------------------------------------|------------------------------|------------------------------|
| 0  | Ac  |                | 1.495           |                                               |                                                        | 24.7                         |                              |
| 1  | Trp | 8.858          | 5.317           | 3.176,3.095                                   | Hδ:7.495, Hε:10.235,7.471,<br>Hζ:7.297,7.104, Hη:7.217 | 57.62                        | 30.76                        |
| 2  | Ile | 9.467          | 4.828           | 1.942                                         | Hγ:1.307,1.153,0.877, Hδ:0.752                         | 59.96                        | 42.16                        |
| 3  | Thr | 8.666          | 5.285           | 3.959                                         | Hγ: 1.103 (Me)                                         | 61.92                        | 69.90                        |
| 4  | Val | 9.268          | 4.558           | 2.066                                         | Hγ:0.898,0.878                                         | 59.80                        | 35.21                        |
| 5  | Thr | 8.638          | 5.119           | 3.921                                         | Hγ: 0.945 (Me)                                         | 61.63                        | 68.94                        |
| 6  | Ile | 9.065          | 4.253           | 1.677                                         | Hγ:1.365,0.935,0.738, Hδ:0.785                         | 59.83                        | 40.11                        |
| 7  | His | 9.838          | 4.377           | 3.483,3.290                                   | Hδ:7.321, Hε:8.645                                     | 55.96                        | 27.15                        |
| 8  | Gly | 8.672          | 4.154,<br>3.530 |                                               |                                                        | 45.42                        |                              |
| 9  | Lys | 7.843          | 4.644           | 1.848,1.823                                   | Hγ:1.495,1.396, Hδ:1.715,na,<br>Hε:3.034, Hζ:7.659     | 54.51                        | 34.67                        |
| 10 | Lys | 8.688          | 4.802           | 1.760,1.471                                   | Hγ:1.296,na, Hδ:1.592,na,<br>Hε:2.911, Hζ:7.586        | 56.15                        | 32.82                        |
| 11 | Ile | 9.424          | 4.490           | 1.852                                         | Hγ:1.420,1.194,0.904, Hδ:0.814                         | 59.74                        | 41.43                        |



|    |     |              |        |                    |                                                                                                    |       |       |
|----|-----|--------------|--------|--------------------|----------------------------------------------------------------------------------------------------|-------|-------|
| 12 | Arg | 8.580        | 5.369  | 1.838,1.690        | H $\gamma$ :1.627, H $\delta$ :2.912,2.819,<br>H $\epsilon$ :6.680, H $\eta$ : 5.874,6.371         | 55.19 | 31.3  |
| 13 | Val | 9.611        | 4.644  | 1.975              | H $\gamma$ :0.930,0.887                                                                            | 61.02 | 35.77 |
| 14 | Trp | 8.973        | 4.257  | <b>2.726,1.753</b> | H $\delta$ :6.720, H $\epsilon$ :10.210, <b>5.583</b> ,<br>H $\zeta$ :7.353,6.767, H $\eta$ :7.139 | 56.28 | 28.82 |
| 15 | Thr | 7.828        | 4.217  | 4.159              | H $\gamma$ : 1.068 (Me)                                                                            | 61.33 | 70.23 |
| 16 | Gly | <b>5.192</b> | 3.317, |                    |                                                                                                    | 44.67 |       |

**Table S7G:** Ac-WRWQYVNGKFTPQWTG-NH<sub>2</sub> (based on a peptide by Espinosa et al<sup>3</sup>; Capped, V12P)

| #  | Res | H <sub>N</sub> | H $\alpha$  | H $\beta$ (H $\beta'$ ) | Others                                                                                       |
|----|-----|----------------|-------------|-------------------------|----------------------------------------------------------------------------------------------|
| 0  | Ac  |                | 1.608       |                         |                                                                                              |
| 1  | Trp | 8.512          | 4.835       | 3.025,2.833             | H $\delta$ :7.340,H $\epsilon$ :10.137,7.217,H $\zeta$ :7.291,6.858,H $\eta$ :7.109          |
| 2  | Arg | 8.918          | 4.621       | 1.742,1.667             | H $\gamma$ :1.445,H $\delta$ :3.102,H $\epsilon$ :7.150                                      |
| 3  | Trp | 8.761          | 4.744       | 2.885,2.614             | H $\delta$ :7.092, H $\epsilon$ :10.121,7.002, H $\zeta$ :7.250                              |
| 4  | Gln | 8.628          | 4.700       | 2.036,1.892             | H $\gamma$ :2.176,2.136, H $\epsilon$ :7.410,6.904                                           |
| 5  | Tyr | 8.996          | 4.707       | 2.845,2.680             | H $\delta$ :6.623, H $\epsilon$ :6.623                                                       |
| 6  | Val | 8.630          | 4.148       | 1.962                   | H $\gamma$ :0.875                                                                            |
| 7  | Asn | 9.456          | 4.382       | 3.020,2.719             | H $\delta$ :7.742,7.024                                                                      |
| 8  | Gly | 8.268          | 4.078,3.590 |                         |                                                                                              |
| 9  | Lys | 7.645          | 4.656       | 1.819,1.737             | H $\gamma$ :1.359, H $\delta$ :1.691, H $\epsilon$ :3.012                                    |
| 10 | Phe | 9.157          | 4.755       | 3.021,2.832             | H $\delta$ :6.813, H $\epsilon$ :7.023, H $\zeta$ :6.983                                     |
| 11 | Thr | 9.047          | 4.828       | 4.044                   | H $\gamma$ : 1.221 (Me)                                                                      |
| 12 | Pro |                | 4.148       | ,1.625                  | H $\delta$ :3.252,3.488                                                                      |
| 13 | Gln | 8.948          | 4.606       | 1.965,1.853             | H $\gamma$ :2.244,2.166, H $\epsilon$ :7.431,6.925                                           |
| 14 | Trp | 8.912          | 4.309       | 2.889,2.308             | H $\delta$ :6.849,H $\epsilon$ :10.124, <b>6.081</b> ,H $\zeta$ :7.331,6.734,H $\eta$ :7.106 |
| 15 | Thr | 7.892          | 4.198       | 4.108                   | H $\gamma$ : 0.997 (Me)                                                                      |
| 16 | Gly | <b>6.116</b>   | 3.456,3.408 |                         |                                                                                              |

**Table S7H:** Ac-WVTIpGKKIWTG-NH<sub>2</sub>

| # | Res  | H <sub>N</sub> | H $\alpha$  | H $\beta$ (H $\beta'$ ) | Others                                                                      |
|---|------|----------------|-------------|-------------------------|-----------------------------------------------------------------------------|
| 0 | Ac   |                | 1.449       |                         |                                                                             |
| 1 | Trp  | 8.786          | 5.302       | 3.167,3.090             | over-lapped (essentially random coil)                                       |
| 2 | Val  | 9.499          | 4.639       | 2.097                   | H $\gamma$ :0.908,0.891                                                     |
| 3 | Thr  | 8.709          | 5.244       | 3.976                   | H $\gamma$ : 1.019 (Me)                                                     |
| 4 | Ile  | 9.032          | 4.707       | 1.798                   | H $\gamma$ :1.509,1.113,0.917, H $\delta$ :0.838                            |
| 5 | dPro |                | 4.372       | 1.980,2.396             | H $\gamma$ :2.168,2.061, H $\delta$ :3.921,3.855                            |
| 6 | Gly  | 8.564          | 4.015,3.709 |                         |                                                                             |
| 7 | Lys  | 8.020          | 4.657       | 1.875,1.834             | H $\gamma$ :1.449,1.407, H $\delta$ :1.712, H $\epsilon$ :3.019             |
| 8 | Lys  | 8.649          | 5.044       | 1.728,1.672             | H $\gamma$ :1.380,1.295, H $\delta$ :1.305,1.303, H $\epsilon$ :2.454,2.351 |
| 9 | Ile  | 9.629          | 4.690       | 1.868                   | H $\gamma$ :1.483,1.278,0.865, H $\delta$ :1.271                            |

|    |     |              |             |                    |                                                                                              |
|----|-----|--------------|-------------|--------------------|----------------------------------------------------------------------------------------------|
| 10 | Trp | 9.023        | 4.319       | <b>2.804,1.953</b> | H $\delta$ :6.764,H $\epsilon$ :10.191, <b>5.557</b> ,H $\zeta$ :7.342,6.685,H $\eta$ :7.122 |
| 11 | Thr | 7.910        | 4.239       | 4.169              | H $\gamma$ : 5.599 (OH), 1.073 (Me)                                                          |
| 12 | Gly | <b>5.364</b> | 3.359,3.318 |                    |                                                                                              |

**Table S7I:** Ac-WVTIpGKKIFTG-NH<sub>2</sub>

| #  | Res  | H <sub>N</sub> | H $\alpha$  | H $\beta$ (H $\beta'$ ) | Others                                                                              |
|----|------|----------------|-------------|-------------------------|-------------------------------------------------------------------------------------|
| 0  | Ac   |                | 1.842       |                         |                                                                                     |
| 1  | Trp  | 8.598          | 5.215       | 3.059,3.059             | H $\delta$ :7.384,H $\epsilon$ :10.325,7.421,H $\zeta$ :7.373,7.097,H $\eta$ :7.233 |
| 2  | Val  | 9.369          | 4.637       | 2.130                   | H $\gamma$ :0.915,0.898                                                             |
| 3  | Thr  | 8.623          | 5.208       | 3.974                   | H $\gamma$ : 1.028 (Me)                                                             |
| 4  | Ile  | 9.003          | 4.696       | 1.795                   | H $\gamma$ :1.500,1.121,0.912, H $\delta$ :0.836                                    |
| 5  | dPro |                | 4.373       | 1.971,2.382             | H $\gamma$ :2.049,2.149, H $\delta$ :3.855,3.900                                    |
| 6  | Gly  | 8.538          | 4.006,3.722 |                         |                                                                                     |
| 7  | Lys  | 8.025          | 4.644       | 1.857,1.830             | H $\gamma$ :1.439,1.407, H $\delta$ :1.704, H $\epsilon$ :3.011                     |
| 8  | Lys  | 8.627          | 5.038       | 1.709,1.709             | H $\gamma$ :1.384,1.308, H $\delta$ :1.320,1.320, H $\epsilon$ :2.523,2.458         |
| 9  | Ile  | 9.441          | 4.560       | 1.800                   | H $\gamma$ :1.442,1.200,0.836, H $\delta$ :0.821                                    |
| 10 | Phe  | 8.872          | 4.253       | <b>2.525,1.397</b>      | H $\delta$ : <b>6.218</b> , H $\epsilon$ :7.136, H $\zeta$ :7.161                   |
| 11 | Thr  | 8.094          | 4.219       | 4.186                   | H $\gamma$ : 1.077 (Me)                                                             |
| 12 | Gly  | <b>6.621</b>   | 3.649,3.586 |                         |                                                                                     |

**Table S7J:** Ac-FVTIpGKKIWTG-NH<sub>2</sub>

| #  | Res  | H <sub>N</sub> | H $\alpha$  | H $\beta$ (H $\beta'$ ) | Others                                                                                       |
|----|------|----------------|-------------|-------------------------|----------------------------------------------------------------------------------------------|
| 0  | Ac   |                | 1.690       |                         |                                                                                              |
| 1  | Phe  | 8.448          | 5.290       | 2.757,2.661             | H $\delta$ :7.149, H $\epsilon$ :7.415, H $\zeta$ :7.374                                     |
| 2  | Val  | 9.052          | 4.481       | 2.067                   | H $\gamma$ :0.898,0.868                                                                      |
| 3  | Thr  | 8.592          | 5.139       | 3.952                   | H $\gamma$ : 0.995 (Me)                                                                      |
| 4  | Ile  | 8.900          | 4.672       | 1.787                   | H $\gamma$ :1.496,1.105,0.905, H $\delta$ :0.838                                             |
| 5  | dPro |                | 4.365       | 1.965,2.375             | H $\gamma$ :2.131,2.038, H $\delta$ :3.877,3.869                                             |
| 6  | Gly  | 8.503          | 4.003,3.700 |                         |                                                                                              |
| 7  | Lys  | 8.007          | 4.580       | 1.834,1.796             | H $\gamma$ :1.440,1.369, H $\delta$ :1.686, H $\epsilon$ :3.007                              |
| 8  | Lys  | 8.585          | 4.707       | 1.580,1.443             | H $\gamma$ :1.260,1.042, H $\delta$ :1.253,1.161, H $\epsilon$ :2.358,2.289                  |
| 9  | Ile  | 9.298          | 4.498       | 1.888                   | H $\gamma$ :1.438,1.266,0.881, H $\delta$ :0.814                                             |
| 10 | Trp  | 9.093          | 4.614       | 3.248,3.056             | H $\delta$ :6.997,H $\epsilon$ :10.235, <b>6.542</b> ,H $\zeta$ :7.378,6.933,H $\eta$ :7.157 |
| 11 | Thr  | 8.170          | 4.274       | 4.186                   | H $\gamma$ : 1.111 (Me)                                                                      |
| 12 | Gly  | <b>6.653</b>   | 3.622,3.416 |                         |                                                                                              |

**Table S7K:** (Pr-WTTVCIRKWTGPK-NH<sub>2</sub>)<sub>2</sub>

| #  | Res | HN           | H $\alpha$      | H $\beta$ (H $\beta'$ ) | Others                                                                                           | <sup>13</sup> C $\alpha$ | <sup>13</sup> C $\beta$ |
|----|-----|--------------|-----------------|-------------------------|--------------------------------------------------------------------------------------------------|--------------------------|-------------------------|
| 0  | Pr  |              | 1.459,<br>1.881 | 0.392                   |                                                                                                  |                          | 11.19                   |
| 1  | Trp | 8.392        | 5.151           | 3.132,3.090             | H $\delta$ :7.469,H $\epsilon$ :10.33,7.40,H $\zeta$ :7.38,7.127,H $\eta$ :7.228                 |                          |                         |
| 2  | Thr | 9.394        | 4.735           | 4.053                   | H $\gamma$ : 1.135 (Me)                                                                          |                          | 71.66                   |
| 3  | Thr | 8.824        | 5.117           | 4.003                   | H $\gamma$ : 1.137 (Me)                                                                          |                          | 69.85                   |
| 4  | Val | 9.085        | 4.381           | 2.001                   | H $\gamma$ :0.938,0.936                                                                          | 61.44                    | 34.38                   |
| 5  | Cys | 9.188        | 5.709           | 3.000,2.602             | H $\gamma$ :na                                                                                   | 55.42                    |                         |
| 6  | Ile | 9.047        | 4.554           | 1.911                   | H $\gamma$ :1.472,1.214,0.944, H $\delta$ :0.887                                                 | 59.78                    | 41.97                   |
| 7  | Arg | 8.701        | 5.285           | 1.792,1.659             | H $\gamma$ :1.578,1.560, H $\delta$ :2.811,2.763, H $\epsilon$ :6.655,<br>H $\eta$ :6.284, 5.853 |                          | 31.60                   |
| 8  | Lys | 9.455        | 4.958           | 1.816,1.700             | H $\gamma$ :1.405,1.346, H $\delta$ :1.678,1.639, H $\epsilon$ :2.910,<br>H $\zeta$ :7.703       |                          | 36.49                   |
| 9  | Trp | 9.142        | 4.271           | <b>2.774,1.949</b>      | H $\delta$ :6.636,H $\epsilon$ :9.857, <b>5.569</b> ,H $\zeta$ :7.369,6.692,H $\eta$ :7.127      | 56.93                    | 28.57                   |
| 10 | Thr | 8.057        | 4.285           | 4.132                   | H $\gamma$ : 1.028 (Me)                                                                          | 61.33                    | 69.52                   |
| 11 | Gly | <b>5.731</b> | 3.690,<br>3.271 |                         |                                                                                                  | 44.37                    |                         |
| 12 | Pro |              | 4.397           | 1.950,2.314             | H $\gamma$ :2.054,2.034, H $\delta$ :3.540,3.610                                                 | 63.12                    | 32.20                   |
| 13 | Lys | 8.698        | 4.245           | 1.832,1.769             | H $\gamma$ :1.478,1.430, H $\delta$ :1.666, H $\epsilon$ :2.964, H $\zeta$ :7.573                | 56.58                    | 33.04                   |

**Table S7L:** (WTTVCIRKWTGPK-NH<sub>2</sub>)<sub>2</sub>

| #  | Res | HN    | H $\alpha$  | H $\beta$ (H $\beta'$ ) | Others                                                                                 |
|----|-----|-------|-------------|-------------------------|----------------------------------------------------------------------------------------|
| 1  | Trp |       | 4.461       | 3.232,3.192             | H $\delta$ :7.259,H $\epsilon$ :10.424,7.423,H $\zeta$ :7.575,7.167,H $\eta$ :7.294    |
| 2  | Thr | 9.017 | 4.622       | 4.113                   | H $\gamma$ : 1.163 (Me)                                                                |
| 3  | Thr | 8.704 | 4.904       | 4.046                   | H $\gamma$ : 1.157 (Me)                                                                |
| 4  | Val | 8.839 | 4.344       | 2.004                   | H $\gamma$ : 0.930                                                                     |
| 5  | Cys | 9.003 | 5.443       | 2.988,2.746             | H $\gamma$ :na                                                                         |
| 6  | Ile | 8.935 | 4.448       | 1.902                   | H $\gamma$ :1.461,1.192,0.927, H $\delta$ :0.869                                       |
| 7  | Arg | 8.621 | 4.730       | 1.571,                  | H $\gamma$ :1.442,1.306, H $\delta$ :2.593,2.566, H $\epsilon$ :6.725                  |
| 8  | Lys | 8.982 | 4.620       | 1.807,1.648             | H $\gamma$ :1.394,1.365, H $\delta$ :na, H $\epsilon$ :2.915                           |
| 9  | Trp | 8.962 | 4.290       | 3.153,3.058             | H $\delta$ :7.028, H $\epsilon$ :10.053,7.115, H $\zeta$ :7.413,7.011, H $\eta$ :7.165 |
| 10 | Thr | 7.685 | 4.266       | 4.103                   | H $\gamma$ : 1.081 (Me)                                                                |
| 11 | Gly | 7.423 | 3.838,3.713 |                         |                                                                                        |
| 12 | Pro |       | 4.410       | 1.957,2.322             | H $\gamma$ :2.047, H $\delta$ :3.621,3.594                                             |
| 13 | Lys | 8.621 | 4.204       | 1.795,1.733             | H $\gamma$ :1.433,1.376, H $\delta$ :1.617, H $\epsilon$ :2.907                        |

**Table S7M:** WTTVCIRKWTGPK-NH<sub>2</sub> (monomer)

| #  | Res | HN    | H $\alpha$  | H $\beta$ (H $\beta'$ ) | Others                                                                                  |
|----|-----|-------|-------------|-------------------------|-----------------------------------------------------------------------------------------|
| 1  | Trp |       | 4.389       | 3.436,3.382             | H $\delta$ :7.291, H $\epsilon$ :10.291,7.602, H $\zeta$ :7.515,7.149, H $\eta$ :7.248  |
| 2  | Thr |       | 4.412       | 4.099                   | H $\gamma$ : 1.161 (Me)                                                                 |
| 3  | Thr | 8.420 | 4.284       | 4.149                   | H $\gamma$ : 1.222 (Me)                                                                 |
| 4  | Val | 8.376 | 4.076       | 2.035                   | H $\gamma$ :0.935,0.920                                                                 |
| 5  | Cys | 8.624 | 4.477       | 2.834,2.834             | H $\gamma$ :na                                                                          |
| 6  | Ile | 8.521 | 4.142       | 1.849                   | H $\gamma$ :1.468,1.199,0.889, H $\delta$ :0.858                                        |
| 7  | Arg | 8.540 | 4.289       | 1.709,1.709             | H $\gamma$ :1.562,1.516, H $\delta$ :3.098, H $\epsilon$ :7.184, H $\eta$ :6.170, 7.142 |
| 8  | Lys | 8.508 | 4.301       | 1.744,1.685             | H $\gamma$ :1.398,1.354, H $\delta$ :1.658, H $\epsilon$ :2.955                         |
| 9  | Trp | 8.604 | 4.713       | 3.267,3.267             | H $\delta$ :7.244, H $\epsilon$ :10.168,7.634, H $\zeta$ :7.488,7.153, H $\eta$ :7.244  |
| 10 | Thr | 8.068 | 4.274       | 4.142                   | H $\gamma$ : 1.114 (Me)                                                                 |
| 11 | Gly | 7.351 | 3.861,3.706 |                         |                                                                                         |
| 12 | Pro |       | 4.419       | 1.955,2.330             | H $\gamma$ :2.058,2.058, H $\delta$ :3.625,3.625                                        |
| 13 | Lys | 8.619 | 4.223       | 1.807,1.746             | H $\gamma$ :1.435,1.376, H $\delta$ :1.628, H $\epsilon$ :2.927                         |

**Table S7N:** Ac-WipGKWTGP-KG-KTWNPATGKWTE at 290K \*<sup>1</sup>

| #  | Res  | HN           | H $\alpha$  | H $\beta$ (H $\beta'$ ) | Others                                                                                      |
|----|------|--------------|-------------|-------------------------|---------------------------------------------------------------------------------------------|
| 1  | Trp  | 8.718        | 5.010       | 3.309,3.102             | H $\delta$ :7.463,H $\epsilon$ :10.072,7.315,H $\zeta$ :7.181,7.119,H $\eta$ :7.372         |
| 2  | Ile  | 9.136        | 4.736       | 1.822                   | H $\gamma$ :1.417,1.099,0.891,H $\delta$ :0.816                                             |
| 3  | dPro |              | 4.422       | 2.373,2.148             | H $\gamma$ :2.064,1.985,H $\delta$ :3.895,3.849                                             |
| 4  | Gly  | 8.762        | 4.021,3.931 |                         |                                                                                             |
| 5  | Lys  | 8.145        | 4.801       | 1.894,1.799             | H $\gamma$ :1.337,H $\delta$ :1.685,H $\epsilon$ :2.985                                     |
| 6  | Trp  | 8.816        | 4.187       | <b>2.744,1.929</b>      | H $\delta$ :6.735,H $\epsilon$ :9.788, <b>5.688</b> ,H $\zeta$ :7.375,6.798,H $\eta$ :7.175 |
| 7  | Thr  | 7.765        | 4.239       | 4.127                   | H $\gamma$ : 1.043 (Me)                                                                     |
| 8  | Gly  | <b>5.178</b> | 3.618,3.099 |                         |                                                                                             |
| 9  | Pro  |              | 4.330       | 2.233                   | H $\gamma$ :1.907,1.832,H $\delta$ :3.323                                                   |
| 10 | Lys  | 8.559        | 4.238       | 1.772,1.730             | H $\gamma$ :1.425,1.376,H $\delta$ :1.633,H $\epsilon$ :2.930                               |
| 11 | Gly  | 8.366        | 3.945       |                         |                                                                                             |
| 12 | Lys  | 8.143        | 4.664       | 1.956                   | H $\gamma$ :1.404,1.304,H $\delta$ :1.493,1.407,H $\epsilon$ :2.711                         |
| 13 | Thr  | 8.905        | 4.750       | 4.061                   | H $\gamma$ : 1.135 (Me)                                                                     |
| 14 | Trp  | 8.898        | 4.109       | <b>2.685,1.964</b>      | H $\delta$ :6.640,H $\epsilon$ :9.999, <b>5.547</b> ,H $\zeta$ :7.265,6.432,H $\eta$ :6.915 |
| 15 | Asn  | 7.555        | 4.895       | 3.079,2.357             | H $\delta$ :7.240,5.934                                                                     |
| 16 | Pro  |              | 3.756       | 2.373                   | H $\gamma$ :2.021,1.977,H $\delta$ :3.671                                                   |
| 17 | Ala  | 7.785        | 4.148       | 1.392                   |                                                                                             |
| 18 | Thr  | 6.903        | 4.261       | 4.121                   | H $\gamma$ : 1.002 (Me)                                                                     |
| 19 | Gly  | 8.004        | 3.744,3.249 |                         |                                                                                             |
| 20 | Lys  | 6.680        | 4.442       | 1.763,1.646             | H $\gamma$ :1.413,1.241,H $\delta$ :1.565,H $\epsilon$ :2.960                               |
| 21 | Trp  | 8.528        | 5.069       | 3.175,                  | H $\delta$ :7.487,H $\epsilon$ :10.154,7.381,H $\zeta$ :7.161,7.069,H $\eta$ :7.373         |
| 22 | Thr  | 9.248        | 4.567       | 4.317                   | H $\gamma$ : 1.215 (Me)                                                                     |
| 23 | Glu  | 8.293        | 4.251       | 2.101,1.942             | H $\gamma$ :2.269                                                                           |

KTWNPATGKWTE isolated at 290K \*<sup>1</sup>

| #  | Res | HN    | H $\alpha$  | H $\beta$ (H $\beta'$ ) | Others                                                                                       |
|----|-----|-------|-------------|-------------------------|----------------------------------------------------------------------------------------------|
| 1  | Lys |       | 4.451       | 2.080, 1.901            | H $\gamma$ :1.418,H $\delta$ :1.258,H $\epsilon$ :2.484,2.391                                |
| 2  | Thr | 9.239 | 4.870       | 4.043                   | H $\gamma$ : 1.243 (Me)                                                                      |
| 3  | Trp | 9.049 | 4.091       | <b>2.648, 1.840</b>     | H $\delta$ :6.631,H $\epsilon$ :10.002, <b>5.425</b> ,H $\zeta$ :7.274,6.430,H $\eta$ :6.910 |
| 4  | Asn | 7.457 | 4.920       | 3.059,2.373             | H $\delta$ :7.19,7.22                                                                        |
| 5  | Pro |       | 3.736       | 2.391,1.987             | H $\gamma$ :2.037,H $\delta$ :3.796,3.665                                                    |
| 6  | Ala | 7.796 | 4.138       | 1.397                   |                                                                                              |
| 7  | Thr | 6.864 | 4.262       | 4.116                   | H $\gamma$ : 0.997 (Me)                                                                      |
| 8  | Gly | 7.970 | 3.734,3.215 |                         |                                                                                              |
| 9  | Lys | 6.621 | 4.496       | 1.767,1.420             | H $\gamma$ :1.256,H $\delta$ :1.671,1.572H $\epsilon$ :2.978                                 |
| 10 | Trp | 8.671 | 5.139       | 3.178                   | H $\delta$ :7.564,H $\epsilon$ :10.361,7.375,H $\zeta$ :7.154,7.181H $\eta$ :7.286           |
| 11 | Thr | 9.402 | 4.645       | 4.330                   | H $\gamma$ : 1.222 (Me)                                                                      |
| 12 | Glu | 8.452 | 4.145       | 2.119,1.952             | H $\gamma$ :2.317,H $\epsilon$ :na                                                           |

Ac-WIpGKWGPS isolated at 290K \*<sup>1</sup>

| #  | Res  | HN           | H $\alpha$  | H $\beta$ (H $\beta'$ ) | Others                                                                                      |
|----|------|--------------|-------------|-------------------------|---------------------------------------------------------------------------------------------|
| 1  | Trp  | 8.860        | 5.049       | 3.341,3.141             | H $\delta$ :7.513,H $\epsilon$ :10.216,7.339,H $\zeta$ :7.287,7.159,H $\eta$ :7.205         |
| 2  | Ile  | 9.245        | 4.764       | 1.858                   | H $\gamma$ :1.446,1.117,0.906,H $\delta$ :0.834                                             |
| 3  | dPro |              | 4.438       | 2.001,2.392             | H $\gamma$ :2.171,2.082,H $\delta$ :3.864,3.935                                             |
| 4  | Gly  | 8.900        | 4.034,3.965 |                         |                                                                                             |
| 5  | Lys  | 8.207        | 4.844       | 1.936,1.811             | H $\gamma$ :1.434,1.342,H $\delta$ :1.700,H $\epsilon$ :2.995                               |
| 6  | Trp  | 8.939        | 4.135       | <b>2.712,1.838</b>      | H $\delta$ :6.739,H $\epsilon$ :9.879, <b>5.570</b> ,H $\zeta$ :7.414,6.813,H $\eta$ :7.182 |
| 7  | Thr  | 7.749        | 4.237       | 4.136                   | H $\gamma$ : 5.519 (OH), 1.056 (Me)                                                         |
| 8  | Gly  | <b>5.041</b> | 3.737,3.189 |                         |                                                                                             |
| 9  | Pro  |              | 4.479       | 2.055,2.330             | H $\gamma$ :2.091,2.039,H $\delta$ :3.526,3.617                                             |
| 10 | Ser  | 8.320        | 4.348       | 3.891,3.866             | H $\gamma$ :na                                                                              |

**Table S70:** Ac-WIpGKWTKGPK-GG-WIpGKWTKGPK-NH<sub>2</sub> at 290K \*<sup>1</sup>

| #  | Res  | HN           | H $\alpha$  | H $\beta$ (H $\beta'$ ) | Others                                                                                      |
|----|------|--------------|-------------|-------------------------|---------------------------------------------------------------------------------------------|
| 1  | Trp  | 8.727        | 5.028       | 3.321,3.112             | H $\delta$ :7.471,H $\epsilon$ :10.054,7.341,H $\zeta$ :7.166,7.141,H $\eta$ :7.265         |
| 2  | Ile  | 9.175        | 4.739       | 1.837                   | H $\gamma$ :1.424,1.105,0.896,H $\delta$ :0.822                                             |
| 3  | dPro |              | 4.421       | 2.372,2.010             | H $\gamma$ :2.145,2.068,H $\delta$ :3.909,3.845                                             |
| 4  | Gly  | 8.775        | 4.016,3.923 |                         |                                                                                             |
| 5  | Lys  | 8.172        | 4.812       | 1.896,1.806             | H $\gamma$ :1.424,1.349,H $\delta$ :1.681,H $\epsilon$ :2.980                               |
| 6  | Trp  | 8.851        | 4.182       | <b>2.725,1.918</b>      | H $\delta$ :6.722,H $\epsilon$ :9.821, <b>5.595</b> ,H $\zeta$ :7.327,6.764,H $\eta$ :7.128 |
| 7  | Thr  | 7.772        | 4.259       | 4.141                   | H $\gamma$ :1.043                                                                           |
| 8  | Gly  | <b>4.968</b> | 3.757,3.176 |                         |                                                                                             |
| 9  | Pro  |              | 4.405       | 2.315                   | H $\gamma$ :2.023,1.946,H $\delta$ :3.576,3.512                                             |
| 10 | Lys  | 8.613        | 4.307       | 1.811,1.761             | H $\gamma$ :1.505,1.444,H $\delta$ :1.665,H $\epsilon$ :2.978                               |

|    |      |              |             |                    |                                                          |
|----|------|--------------|-------------|--------------------|----------------------------------------------------------|
| 11 | Gly  | 8.210        | 3.672       |                    |                                                          |
| 12 | Gly  | 7.547        | 3.654,3.381 |                    |                                                          |
| 13 | Trp  | 8.465        | 4.932       | 3.218,3.050        | Hδ:7.355,Hε:10.176,7.266,Hζ:7.292,7.165,Hη:na            |
| 14 | Ile  | 9.002        | 4.641       | 1.774              | Hγ:1.336,0.999,0.811,Hδ:0.747                            |
| 15 | dPro |              | 4.415       | 2.373,1.974        | Hγ:2.132,2.048,Hδ:3.828                                  |
| 16 | Gly  | 8.705        | 4.012,3.910 |                    |                                                          |
| 17 | Lys  | 8.114        | 4.809       | 1.877,1.809        | Hγ:1.418,1.338,Hδ:1.662,Hε:2.973                         |
| 18 | Trp  | 8.836        | 4.141       | <b>2.741,1.986</b> | Hδ:6.698,Hε:9.781, <b>5.791</b> ,Hζ:7.280,6.739,Hη:7.052 |
| 19 | Thr  | 7.837        | 4.202       | 3.948              | Hγ: 0.960 (Me)                                           |
| 20 | Gly  | <b>6.293</b> | 3.559       |                    |                                                          |
| 21 | Pro  |              | 4.306       | 2.165              | Hγ:1.952,1.873,Hδ:3.450,3.367                            |
| 22 | Lys  | 8.520        | 4.191       | 1.773,1.703        | Hγ:1.423,1.340,Hδ:1.604,Hε:2.914                         |

**Table S7P:** Ac-WITVTI-G<sub>4</sub>K<sub>2</sub>G<sub>4</sub>-KKIRVWTG-NH<sub>2</sub>

| #  | Res | HN           | Hα          | Hβ (Hβ')           | Others                                                    |
|----|-----|--------------|-------------|--------------------|-----------------------------------------------------------|
| 1  | Trp | 8.634        | 5.101       | 3.169,3.145        | Hδ:7.395,Hε:10.198,7.514,Hζ:7.364,7.125,Hη:7.226          |
| 2  | Ile | 9.110        | 4.628       | 1.862              | Hγ:1.350,1.127,0.858,Hδ:0.763                             |
| 3  | Thr | 8.545        | 4.943       | 4.021              | Hγ: 1.141 (Me)                                            |
| 4  | Val | 8.979        | 4.397       | 2.046              | Hγ:na,0.897                                               |
| 5  | Thr | 8.564        | 4.726       | 4.024              | Hγ: 1.095 (Me)                                            |
| 6  | Ile | 8.906        | 4.332       | 1.887              | Hγ:na,1.210,0.920,Hδ:0.829                                |
| 7  | Gly | 8.817        | 4.052,3.959 |                    |                                                           |
|    |     |              |             |                    |                                                           |
| 16 | Gly | 8.415        | 3.908       |                    |                                                           |
| 17 | Lys | 8.382        | 4.442       | 1.795,1.758        | Hγ:1.414,1.382,Hδ:1.682,1.682, Hε:na                      |
| 18 | Lys | 8.541        | 4.866       | 1.695,1.586        | Hγ:1.446,1.358,Hδ:1.603,1.603,Hε:na, Hζ:7.556             |
| 19 | Ile | 8.919        | 4.477       |                    | Hγ:na,na,0.894,Hδ:0.828                                   |
| 20 | Arg | 8.541        | 5.084       | 1.789,1.677        | Hγ:1.555,1.553,Hδ:2.929,2.893, Hε:6.791                   |
| 21 | Val | 9.220        | 4.484       | 1.979              | Hγ:0.917,0.895                                            |
| 22 | Trp | 8.884        | 4.421       | <b>2.914,2.235</b> | Hδ:6.899,Hε:10.203, <b>6.255</b> ,Hζ:7.387,6.887,Hη:7.160 |
| 23 | Thr | 7.909        | 4.214       | 4.170              | Hγ: 1.074 (Me)                                            |
| 24 | Gly | <b>5.859</b> | 3.383,3.435 |                    |                                                           |

\*<sup>1</sup> CSDs reported for these species in the article text are from the more limited data obtained at 280K. Complete assignments, as reported herein, were obtained at 290K.
